# Supplementary material for: Ameliorating the effect and mechanism of chitosan oligosaccharide on nonalcoholic fatty liver disease in mice
Source: Royal Society of Chemistry journal article supplement (doi:10.1039/d3fo03745b), 2023-01-01
Supplement: d3fo03745b2.pdf [file d3fo03745b2.pdf]

Table S1 Required consumables

| Equipment and consumables                                            | Supplier                                    |
|----------------------------------------------------------------------|---------------------------------------------|
| -80°C Refrigerator                                                   | Haier Bio-Medical Company                   |
| ELIASA                                                               | Megu Molecular Instrument Co., LTD          |
| Upright microscope                                                   | Olympus China Co., LTD                      |
| Tissue dehydrator                                                    | Leica Trading Co. LTD                       |
| Microtome                                                            | Leica Trading Co. LTD                       |
| Paraffin embedding machine                                           | Matsu Medical Electronic Technology Company |
| Glucometer                                                           | Roche Diagnostics in Germany                |
| ELISA kit                                                            | Jiangsu Enzyme Free Co. LTD                 |
| Biochemical index kit                                                | Nanjing Institute of Construction           |
| Hematoxylin eosin                                                    | Reagan Biotechnology                        |
| Thermo Real Time PCR                                                 | Thermo Fisher Technology Co. LTD            |
| FT-PCR instrument                                                    | Roche Diagnostic Products Co. LTD           |
| Mini-PROTEAN® Tetra Electrophoresis bath                             | BioRad                                      |
| Gel imager instrument                                                | BioRad                                      |
| Reverse transcription kit                                            | TaKaRa Bio                                  |
| PCR kit(Polymerase chain reaction kit)                               | TaKaRa Bio                                  |
| RNAiso Plus solution                                                 | TaKaRa Bio                                  |
| LightCycler® 480 Multiwell Plate 384                                 | Roche Diagnostic Products Co. LTD           |
| Radio-Immunoprecipitation Assay Lysis Buffer                         | Meilun Biotechnology Co. LTD                |
| BCA(Bicinchoninic Acid Assay) protein concentration quantitative kit | Biyuntian Biotechnology Co., LTD            |
| Block Buffer                                                         | Shanghai Biyuntian Biotechnology Co. LTD    |
| rColorcode Prestained Protein Marker                                 | Thermo-Fisher Co., LTD                      |
| ECL luminescent solution                                             | Meilun Biotechnology Co. LTD                |
| PVDF(Polyvinylidene fluoride) membrane                               | Millipore                                   |

Table S2 Primer information

| Sequencing region | Primer name | Sequence information |
|-------------------|-------------|----------------------|
| V3+V4             | 806R        | GGACTACHVGGGTWTCTA   |

Table S3 GC-MS information

| Item                        | Argument                                                                                                                                                                                                                                                                                    |
|-----------------------------|---------------------------------------------------------------------------------------------------------------------------------------------------------------------------------------------------------------------------------------------------------------------------------------------|
| Sample size                 | 2 $\mu$ L                                                                                                                                                                                                                                                                                   |
| Front Inlet Mode            | 1:1                                                                                                                                                                                                                                                                                         |
| Carrier Gas                 | Helium                                                                                                                                                                                                                                                                                      |
| Column                      | DB-FFAP (30m x 0.25mm x 0.25 $\mu$ m)                                                                                                                                                                                                                                                       |
| Column Flow                 | 1.2 mL/min                                                                                                                                                                                                                                                                                  |
| Oven Temperature Ramp       | Heat at 90 $^{\circ}$ C for 1 minute, heat up to 100 $^{\circ}$ C at a rate of 25 $^{\circ}$ C /minute, then heat up to 150 $^{\circ}$ C at a rate of 20 $^{\circ}$ C /minute, heat up to 200 $^{\circ}$ C at a rate of 25 $^{\circ}$ C /minute, heat up for 0.5 minutes, run for 3 minutes |
| Front Injection Temperature | 200 $^{\circ}$ C                                                                                                                                                                                                                                                                            |
| Transfer Line Temperature   | 23 $^{\circ}$ C                                                                                                                                                                                                                                                                             |
| Ion Source Temperature      | 230 $^{\circ}$ C                                                                                                                                                                                                                                                                            |
| Quad Temperature            | 150 $^{\circ}$ C                                                                                                                                                                                                                                                                            |
| Electron Energy             | 70eV                                                                                                                                                                                                                                                                                        |
| Scan Mode                   | dMRM                                                                                                                                                                                                                                                                                        |
| Solvent Delay               | 3.0min                                                                                                                                                                                                                                                                                      |

Table S4 Antibody information

| Antibody name | Manufacturer | Dilution ratio |
|---------------|--------------|----------------|
|---------------|--------------|----------------|

|                |                           |         |
|----------------|---------------------------|---------|
| AKT            | Protein tech              | 1: 1000 |
| p-AKT          | Cell Signaling Technology | 1: 1000 |
| mTOR           | ZEN-BIOSCIENCE            | 1: 500  |
| p-mTOR         | Cell Signaling Technology | 1: 1000 |
| PI3K           | Cell Signaling Technology | 1: 1000 |
| S6K            | Abcam                     | 1: 2000 |
| p-S6K          | Cell Signaling Technology | 1: 2000 |
| Lipin-1        | Abcam                     | 1: 1000 |
| SREBP1c        | Abcam                     | 1: 1000 |
| ACC            | Abcam                     | 1: 1000 |
| FAS            | Abcam                     | 1: 1000 |
| SCD-1          | Abcam                     | 1: 1000 |
| UCP1           | Abcam                     | 1: 1000 |
| PGC-1 $\alpha$ | Protein tech              | 1: 1000 |
| GADPH          | Protein tech              | 1: 2500 |

Table S5 Primer sequences

| Gene           | Forward primer        | Reverse primer       |
|----------------|-----------------------|----------------------|
| ACC            | GGCCAGTGCTATGCTGAGAT  | AGGGTCAAGTGCTGCTCCA  |
| UCP1           | GTGAAGGTCAGAATGCAAGC  | AGGGCCCCCTTCATGAGGTC |
| PGC-1 $\alpha$ | GTCGGAAGACACCTTCCTCTC | AGAGCAGCACACTGGTTGG  |
| FAS            | GGGAAGCCCATCACCATCTTC | AGAGGGGCCATCCACAGTCT |

|                |                           |                         |
|----------------|---------------------------|-------------------------|
| GADPH          | AGGTCGGTGTGAACGGATTG      | TGTAGACCATGTAGTTGAGGTCA |
| IL-10          | GCTGTCATCGATTTCTCCCCT     | GACACCTTGGTCTTGGAGCTTAT |
| IL-1 $\beta$   | TGCCACCTTTTGACAGTGATG     | TGATGTGCTGCTGCGAGATT    |
| IL-6           | GACAAAGCCAGAGTCCTTCAGA    | TGTGACTCCAGCTTATCTCTTGG |
| AKT            | GCCGCCTGATCAAGTTCTCC      | TTCAGATGATCCATGCGGGG    |
| mTOR           | GCATAACAGATCCTGACCCTGAT   | TTCAGAGCCACAAACAGAGC    |
| SCD1           | TTCTTACACGACCACCACCA      | CAGCCGAGCCTTGTAAGTTC    |
| SREBP1c        | GGAGCCATGGATTGCACATT      | GGCCCGGAAGTCACTGT       |
| TNF- $\alpha$  | GATCGGTCCCCAAAGGGATG      | CCACTTGGTGGTTTGTGAGTG   |
| PI3K           | TTATATAGAAATGGATCCACCAGCA | TTCATTCACTTCTCCCTTGAGA  |
| S6K            | GAGCTGGAGGAGGGGG          | ACAATGTTCCATGCCAAGTTCA  |
| Lipin-1        | TGCTCGTGAATCCTCTTGAACA    | CCTGCGTGAAGACACTGACC    |
| $\beta$ -actin | GGATGCAGAAGGAGATCACTG     | CGATCCACACGGAGTACTTG    |

---
